# Supplementary material for: NIR shielding performance and spectral selectivity of PVB interlayer films loaded with composite fillers derived from CsWO3 coupled with Au nanorods
Source: Royal Society of Chemistry journal article supplement (doi:10.1039/d3tc01705b), 2023-01-01
Supplement: d3tc01705b1.pdf [file d3tc01705b1.pdf]

## Electronic Supplementary Information

### *Synthesis and characterizations of Au nanorods, CsWO<sub>3</sub> and the composite/mixed fillers*

Tungsten hexachloride (WCl<sub>6</sub>), cesium hydroxide monohydrate (CsOH.H<sub>2</sub>O), gold (III) chloride trihydrate (HAuCl<sub>4</sub>.3H<sub>2</sub>O), sodium borohydride (NaBH<sub>4</sub>), and cetyltrimethylammonium bromide (CTAB) were supplied from Sigma-Aldrich Pty Ltd. Silver nitrate (AgNO<sub>3</sub>), was purchased from Merck Co.Ltd.. Ascorbic acid was obtained from Tokyo Chemical Industry Co. Ltd. All these chemicals were analytical grade and used as received.

### *Synthesis of gold nanorods (Au<sub>NR</sub>)*

Au nanorods were synthesized via a seed-mediated growth method.<sup>1</sup> The seed solution was firstly prepared by dissolving 0.01 M of HAuCl<sub>4</sub> in of CTAB solution (0.1 M) with gently stirring for 5 min. Then, an ice-cold solution of NaBH<sub>4</sub> (0.01 M) was added and the mixture was vigorously stirred for another 2 min. At this stage, change in color of the solution from yellow to brownish shall be noticed. The CTAB-stabilized seed solution was left at room temperature for 2 h without stirring. Next, the growth solution was prepared by mixing CTAB (0.1 M) with AgNO<sub>3</sub> (0.006 M) and HAuCl<sub>4</sub> (0.01 M) in an aqueous solution of hydrochloric acid (1.0 M) under a gentle stirring. Next, of an aqueous solution of ascorbic acid (0.1 M) was added dropwise, followed by addition of the CTAB-stabilized seed solution (10 μl). The whole mixture was gently stirred for another 10 sec and then left standing at room temperature for 18 h. The product was isolated by centrifugal and then washed with DI water to remove some excess CTAB. Finally, the obtained product was added to 5 ml of DI water and the suspension was kept at room temperature before use.

### *Synthesis of cesium tungsten oxide (CsWO<sub>3</sub>) particles*

In this study, the CsWO<sub>3</sub> particles were synthesized via a water-controlled release solvothermal process.<sup>2</sup> In a typical process, 1.0 mmol of WCl<sub>6</sub> powder and 0.5 mmol of CsOH.H<sub>2</sub>O powder was dissolved in 40 ml of absolute ethanol under stirring. Next, 10 ml of acetic acid was added. The mixture (50 ml) was transferred into a Teflon-lined autoclave, and then heated at 240 °C for 20 h. The obtain product was centrifuged and washed several times with DI water and ethanol. Finally, the cleaned product was dried at 60 °C for 12 h.

### *Characterizations*

The X-ray diffraction patterns of ATO, Au<sub>NR</sub>, CsWO<sub>3</sub>, Au<sub>NR</sub>+CsWO<sub>3</sub> and Au<sub>NR</sub>@CsWO<sub>3</sub> particles were examined by using a Bruker D8 Advance X-ray

diffractometer with Cu K $\alpha$  radiation ( $\lambda = 1.5406 \text{ \AA}$ ) in the  $2\theta$  ranging from  $20^\circ$ - $90^\circ$ . The crystallite size was also calculated by using the Scherrer's equation;

$$D=0.9\lambda/\beta\cos\theta$$

where D is the crystal size (nm)

$\lambda$  is the X-ray wavelength (CuK $\alpha = 0.15406 \text{ nm}$ )

$\beta$  is the Line broadening (full width) at half maximum of the peak (radians)

$\theta$  is the Bragg angle ( $^\circ$ )

Morphological characterization of Au<sub>NR</sub>, CsWO<sub>3</sub> and nanocomposites were analyzed by transmission electron microscopy (Thermo scientific, Talos) with an EDS attachment. TEM specimens were prepared by dropping an aqueous particle solution on a carbon-coated copper grid and then evaporating the solution at room temperature.

Length, diameter and L/D ratio of the fillers were evaluated by using SEM images with the ImageJ software (version 1.53V). In addition, the standard deviation values were determined by the following equation;

$$s = \sqrt{\frac{\sum (x_i - \bar{x})^2}{n}}$$

Where  $x_i$  = individual sample value

$\bar{x}$  = sample average

$n$  = total number of sample

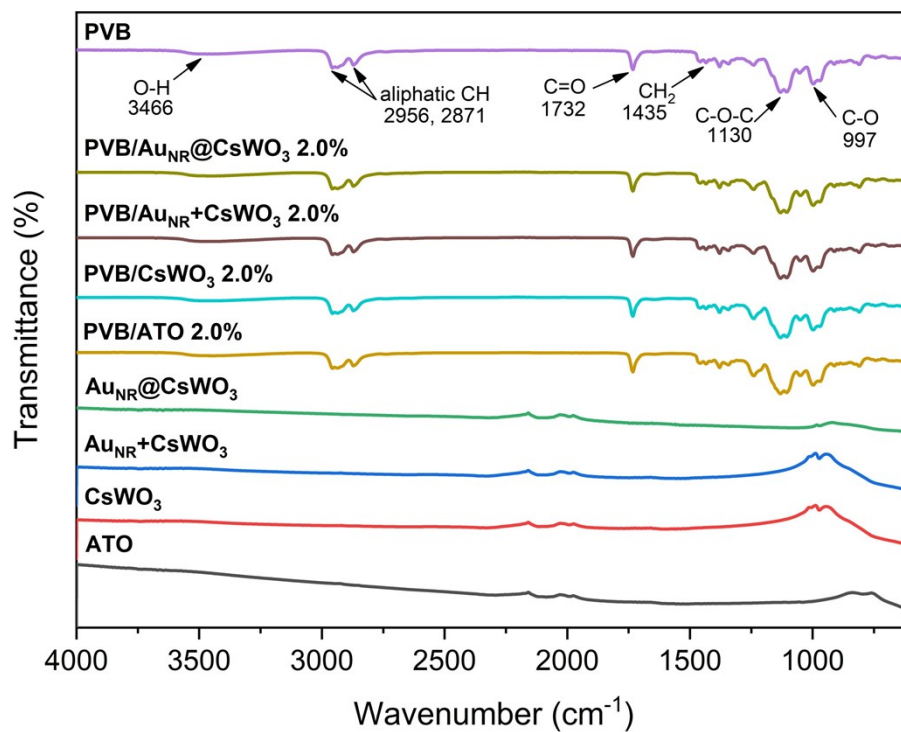

Fig. S1 FTIR spectra of PVB film.

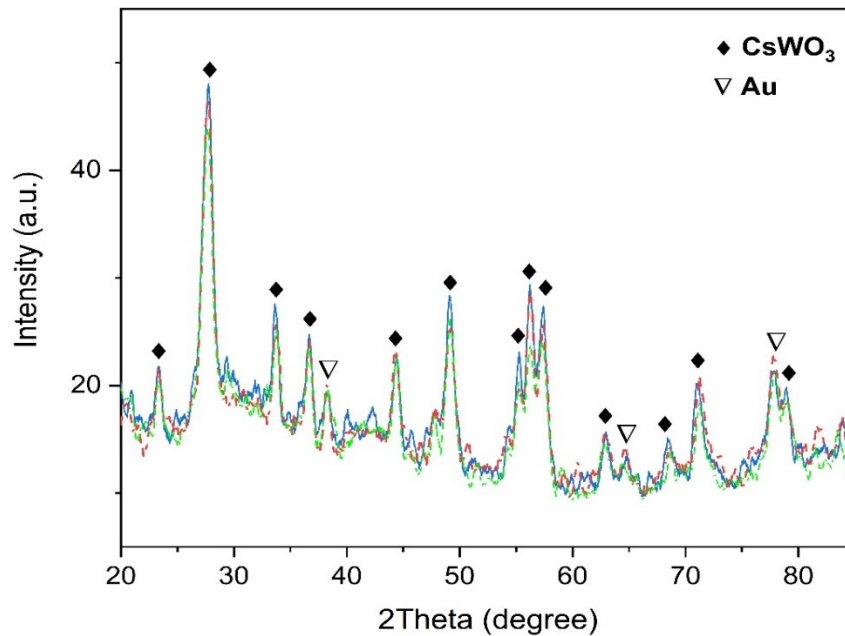

Fig. S2 Overlaid XRD patterns obtained by randomly sampling of the type-1 composite filler ( $\text{Au}_{\text{NR}}+\text{CsWO}_3$ ).

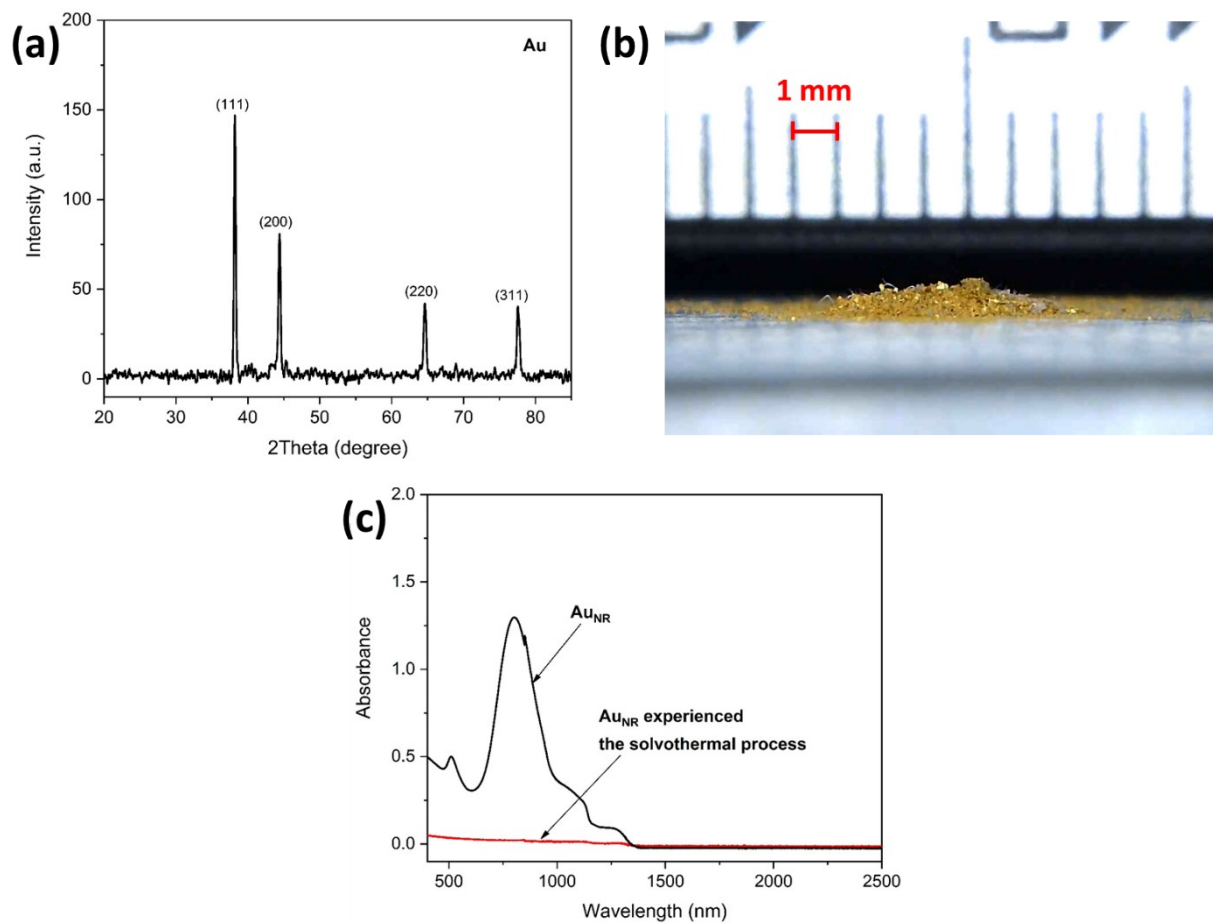

**Fig. S3** (a) XRD pattern, (b) Microscope image and (c) UV/Vis/NIR spectrum of Au nanorods experienced the solvothermal process.

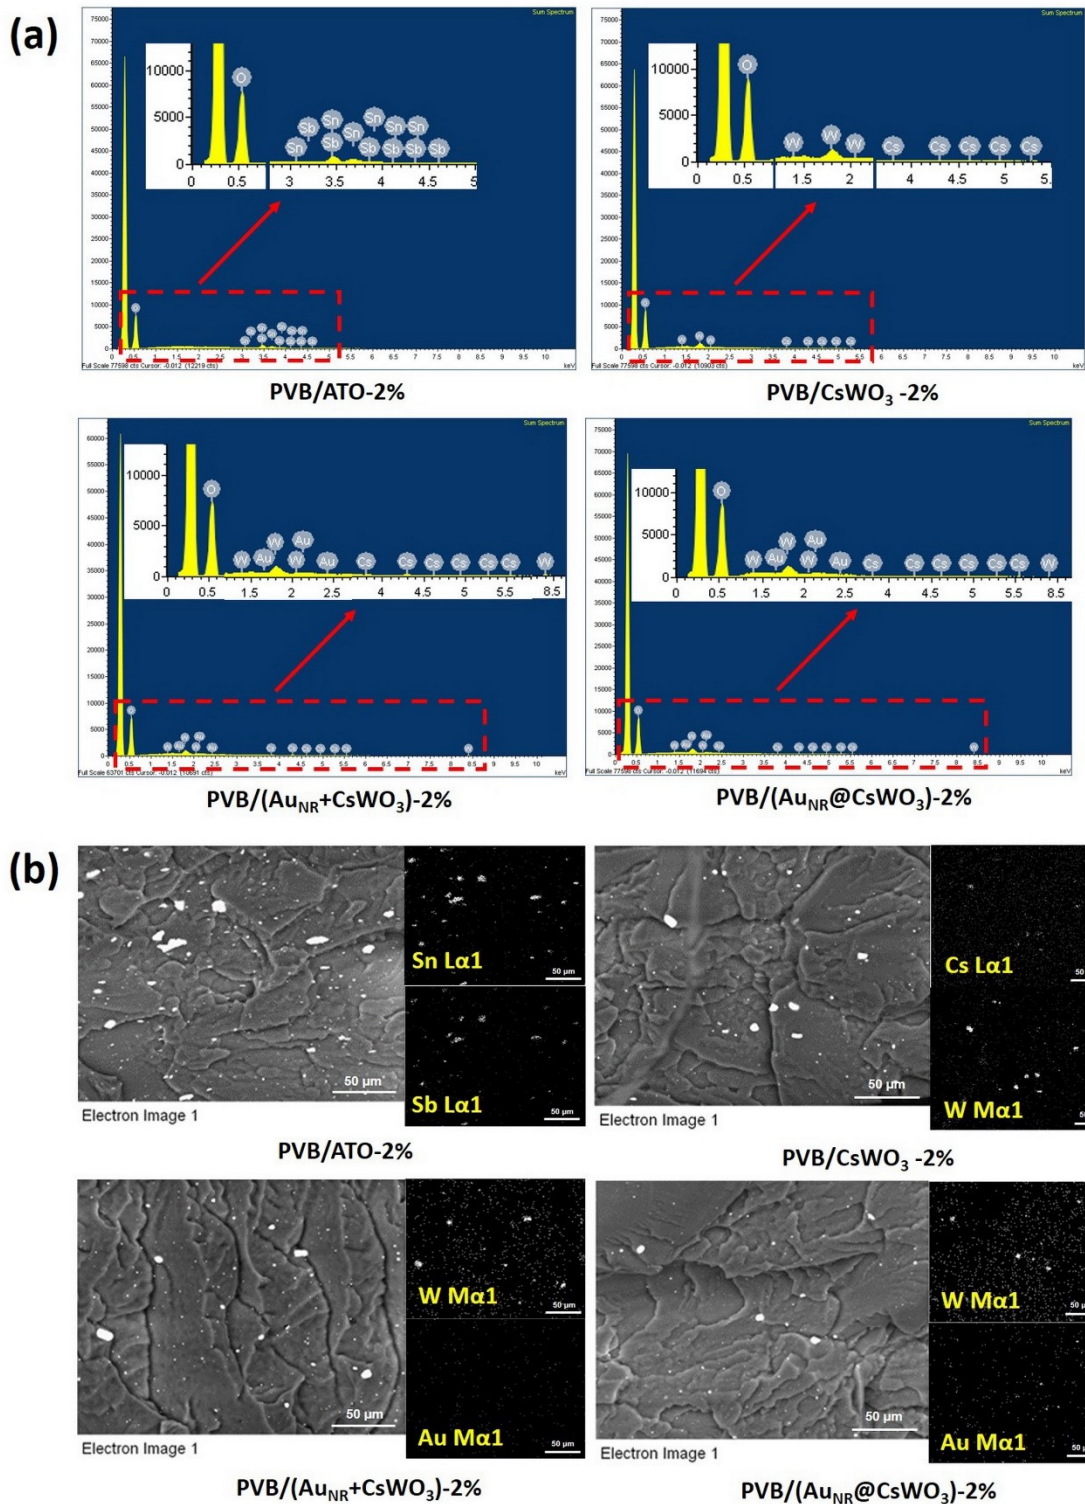

Fig. S4 (a) EDX patterns and (b) SEM images and EDX dot maps of PVB composite films load with 2.0 wt% of the different types of fillers.

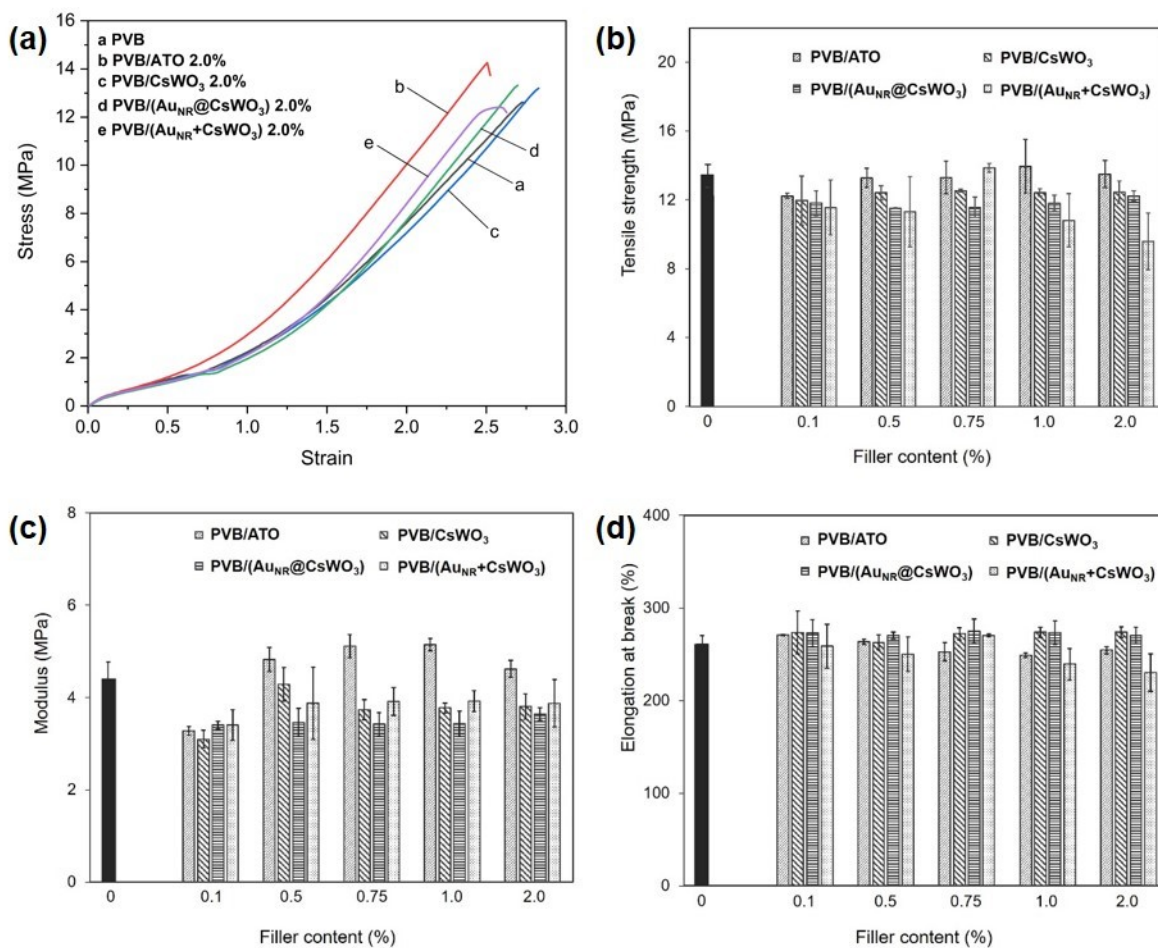

**Fig. S5** (a) Overlaid stress-strain curves of PVB films loaded with 2.0 wt% of different fillers. (b) Tensile strength, (c) modulus, (d) elongation of PVB films containing different types and concentration of fillers.

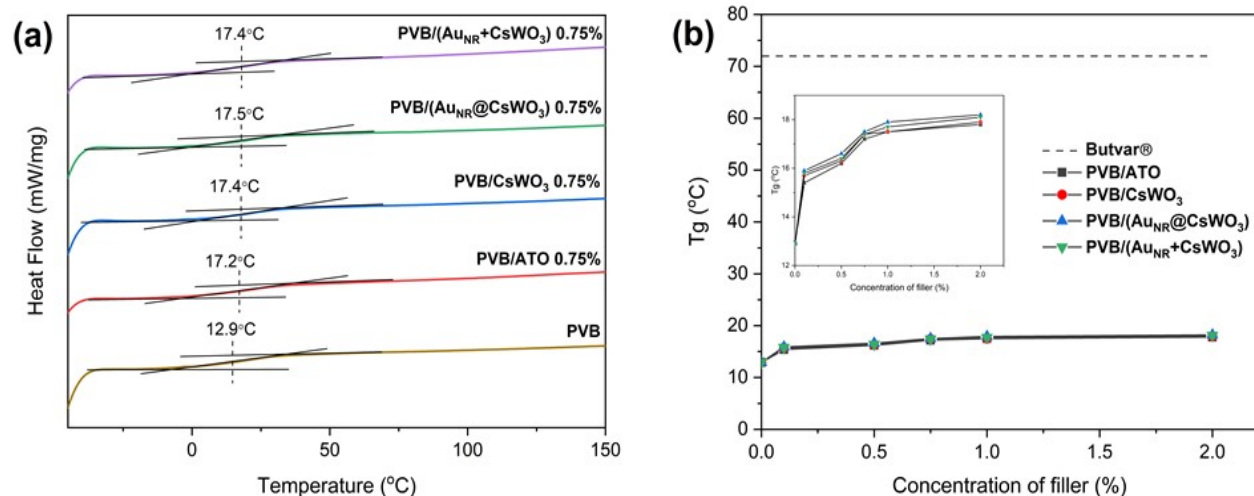

**Fig. S6** (a) DSC thermograms (the second heating run) of PVB films mixed with different types of filler (0.75 wt%). (b) Changes in  $T_g$  values of PVB composite films with percentage loading of the filler.

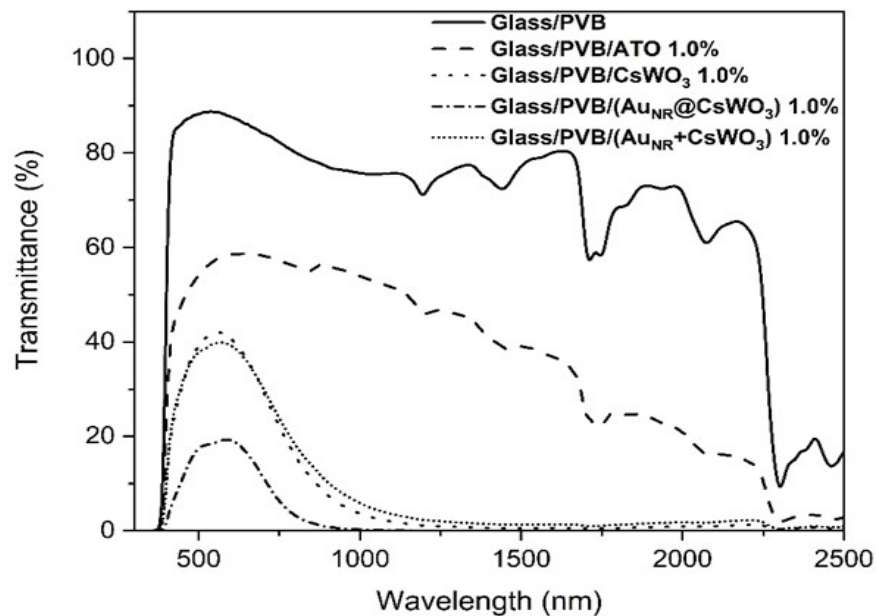

**Fig. S7** UV/Vis/NIR spectra of the various glass/PVB laminates.

**Table S1** Intensity data of Au<sub>NR</sub>+CsWO<sub>3</sub> (Type 1) and Au<sub>NR</sub>@CsWO<sub>3</sub> (Type 2)

| Samples                                         |                   | <i>hkl</i>       | 2θ (degree) | Height (count) | Relative intensity (%) |     |
|-------------------------------------------------|-------------------|------------------|-------------|----------------|------------------------|-----|
| Au <sub>NR</sub> +CsWO <sub>3</sub><br>(Type 1) | CsWO <sub>3</sub> | 002              | 23.6        | 56             | 14.4                   |     |
|                                                 |                   | 200              | 27.7        | 390            | 100.0                  |     |
|                                                 |                   | 112              | 34          | 45             | 11.5                   |     |
|                                                 |                   | 202              | 36.7        | 48             | 12.3                   |     |
|                                                 |                   | 212              | 44.4        | 31             | 7.9                    |     |
|                                                 |                   | 220              | 49          | 44             | 11.3                   |     |
|                                                 |                   | 204              | 55.8        | 19             | 4.9                    |     |
|                                                 |                   | 312              | 56.3        | 35             | 9.0                    |     |
|                                                 |                   | 400              | 57.6        | 25             | 6.4                    |     |
|                                                 |                   | 224              | 71.3        | 11             | 2.8                    |     |
|                                                 |                   | 420              | 79          | 13             | 3.3                    |     |
|                                                 |                   | Au <sub>NR</sub> | 111         | 38.2           | 12                     | 3.1 |
|                                                 |                   |                  | 311         | 77.6           | 11                     | 2.8 |
| Au <sub>NR</sub> @CsWO <sub>3</sub><br>(Type 2) | CsWO <sub>3</sub> | 002              | 23.6        | 189            | 31.4                   |     |
|                                                 |                   | 200              | 27.7        | 602            | 100.0                  |     |
|                                                 |                   | 112              | 34          | 134            | 22.3                   |     |
|                                                 |                   | 202              | 36.7        | 202            | 33.6                   |     |
|                                                 |                   | 212              | 44.4        | 72             | 12.0                   |     |
|                                                 |                   | 220              | 49          | 124            | 20.6                   |     |
|                                                 |                   | 204              | 55.8        | 62             | 10.3                   |     |
|                                                 |                   | 312              | 56.3        | 96             | 15.9                   |     |
|                                                 |                   | 400              | 57.6        | 110            | 18.3                   |     |
|                                                 |                   | 224              | 71.3        | 57             | 9.5                    |     |
|                                                 |                   | 420              | 79          | 40             | 6.6                    |     |
|                                                 |                   | Au <sub>NR</sub> | 111         | 38.2           | 45                     | 7.5 |
|                                                 |                   |                  | 311         | 77.6           | 26                     | 4.3 |

**Table S2** Dimensions of the agglomerated particles

| Samples                                       | Dimensions   |               |                     |
|-----------------------------------------------|--------------|---------------|---------------------|
|                                               | Length (μm)  | Diameter (μm) | Aspect ratios (L/D) |
| PVB/ATO-2%                                    | 12.2 (± 4.7) | 5.8 (± 1.6)   | 2.1 (± 0.7)         |
| PVB/CsWO <sub>3</sub> -2%                     | 7.5 (± 1.4)  | 4.3 (± 1.2)   | 1.7 (± 0.5)         |
| PVB/(Au <sub>NR</sub> +CsWO <sub>3</sub> )-2% | 9.5 (± 2.5)  | 5.2 (± 1.1)   | 1.8 (± 0.4)         |
| PVB/Au <sub>NR</sub> @CsWO <sub>3</sub> -2%   | 6.9 (± 0.4)  | 4.2 (± 0.7)   | 1.6 (± 0.3)         |



**Table S3** Cost analysis of the PVB/(Au<sub>NR</sub>@CsWO<sub>3</sub>) film compared with those of the commercial NIR shielding materials and the existing products.

| <b>Materials</b>                                                 | <b>Estimated Product Price</b> | <b>Optical properties</b>                                                   | <b>References</b>  |
|------------------------------------------------------------------|--------------------------------|-----------------------------------------------------------------------------|--------------------|
| Au <sub>NR</sub> @CsWO <sub>3</sub>                              | \$71.50 /g #                   | n/a                                                                         | 3-5                |
| ATO                                                              | \$12.24 /g                     | n/a                                                                         | 6                  |
| PVB                                                              | \$ 6 /kg                       | n/a                                                                         | 7                  |
| PVB/(Au <sub>NR</sub> @CsWO <sub>3</sub> )<br>(0.05 wt% loading) | \$42.60 /kg                    | T <sub>NIR</sub> = 55.33 %,<br>T <sub>VIS</sub> = 70.15 %                   | <i>This study,</i> |
| PVB/(Au <sub>NR</sub> @CsWO <sub>3</sub> )<br>(0.1 wt% loading)  | \$78.36 /kg                    | T <sub>NIR</sub> = 31.54 %,<br>T <sub>VIS</sub> = 57.38 %                   | <i>This study</i>  |
| PVB/ATO<br>(1.0 wt% loading)                                     | \$129.12 /kg                   | T <sub>NIR</sub> = 35.77 %,<br>T <sub>VIS</sub> = 30.73 %                   | <i>This study,</i> |
| PVB/ATO (untreated)<br>(0.5 wt% loading)                         | n/a                            | T <sub>NIR</sub> = 57 %,<br>T <sub>VIS</sub> = 68 %                         | 8                  |
| PVB/ATO (silane treated)<br>(0.5 wt% loading)                    | n/a                            | T <sub>NIR</sub> = 47 %,<br>T <sub>VIS</sub> = 60 %                         | 8                  |
| Coating based on a<br>conductive metal oxide<br>(APO)            | \$524.88 /kg                   | NIR ray cut = 70%<br>T <sub>Solar</sub> = 68.6%<br>T <sub>Vis</sub> = 84.7% | 9                  |

# based on prices of the precursors; HAuCl<sub>4</sub> (\$139.10 /g)<sup>3</sup>, CsOH (\$12.37/g)<sup>4</sup>, WCl<sub>6</sub> (\$3.66 /g)<sup>5</sup>

**Table S4** Colorimetric parameters of various PVB composite films

| Samples                                          | $L^*$        | $a^*$        | $b^*$        |
|--------------------------------------------------|--------------|--------------|--------------|
| <b>Before exposure to the open air</b>           |              |              |              |
| PVB/(Au <sub>NR</sub> +CsWO <sub>3</sub> ) 0.1%  | 87.22 ± 0.11 | -1.66 ± 0.02 | 4.98 ± 0.02  |
| PVB/(Au <sub>NR</sub> +CsWO <sub>3</sub> ) 0.5%  | 59.99 ± 0.15 | -3.90 ± 0.02 | 10.86 ± 0.02 |
| PVB/(Au <sub>NR</sub> +CsWO <sub>3</sub> ) 0.75% | 56.51 ± 0.31 | -4.28 ± 0.03 | 11.24 ± 0.10 |
| PVB/(Au <sub>NR</sub> +CsWO <sub>3</sub> ) 1.0%  | 46.63 ± 0.15 | -4.65 ± 0.01 | 11.69 ± 0.02 |
| PVB/(Au <sub>NR</sub> +CsWO <sub>3</sub> ) 2.0%  | 22.19 ± 0.16 | -4.38 ± 0.02 | 10.07 ± 0.04 |
| <b>After exposure to the open air</b>            |              |              |              |
| PVB/(Au <sub>NR</sub> @CsWO <sub>3</sub> ) 0.1%  | 82.19 ± 0.18 | -1.90 ± 0.02 | 6.30 ± 0.05  |
| PVB/(Au <sub>NR</sub> @CsWO <sub>3</sub> ) 0.5%  | 51.50 ± 0.30 | -4.41 ± 0.01 | 10.85 ± 0.06 |
| PVB/(Au <sub>NR</sub> @CsWO <sub>3</sub> ) 0.75% | 37.38 ± 0.24 | -4.01 ± 0.04 | 10.43 ± 0.07 |
| PVB/(Au <sub>NR</sub> @CsWO <sub>3</sub> ) 1.0%  | 27.27 ± 0.45 | -3.92 ± 0.03 | 9.90 ± 0.09  |
| PVB/(Au <sub>NR</sub> @CsWO <sub>3</sub> ) 2.0%  | 5.14 ± 0.12  | -1.68 ± 0.07 | 3.96 ± 0.07  |
| <b>After exposure to the open air</b>            |              |              |              |
| PVB/(Au <sub>NR</sub> +CsWO <sub>3</sub> ) 0.1%  | 87.25 ± 0.06 | -1.69 ± 0.01 | 4.94 ± 0.04  |
| PVB/(Au <sub>NR</sub> +CsWO <sub>3</sub> ) 0.5%  | 59.97 ± 0.10 | -4.01 ± 0.03 | 10.78 ± 0.02 |
| PVB/(Au <sub>NR</sub> +CsWO <sub>3</sub> ) 0.75% | 56.39 ± 0.26 | -4.41 ± 0.02 | 11.09 ± 0.02 |
| PVB/(Au <sub>NR</sub> +CsWO <sub>3</sub> ) 1.0%  | 46.45 ± 0.05 | -4.75 ± 0.03 | 11.55 ± 0.07 |
| PVB/(Au <sub>NR</sub> +CsWO <sub>3</sub> ) 2.0%  | 21.83 ± 0.03 | -4.50 ± 0.02 | 9.92 ± 0.04  |
| PVB/(Au <sub>NR</sub> @CsWO <sub>3</sub> ) 0.1%  | 82.11 ± 0.18 | -1.88 ± 0.01 | 6.24 ± 0.07  |
| PVB/(Au <sub>NR</sub> @CsWO <sub>3</sub> ) 0.5%  | 51.21 ± 0.05 | -4.47 ± 0.00 | 10.73 ± 0.03 |
| PVB/(Au <sub>NR</sub> @CsWO <sub>3</sub> ) 0.75% | 36.73 ± 0.23 | -4.06 ± 0.03 | 10.40 ± 0.06 |
| PVB/(Au <sub>NR</sub> @CsWO <sub>3</sub> ) 1.0%  | 26.7 ± 0.23  | -4.06 ± 0.06 | 9.74 ± 0.02  |
| PVB/(Au <sub>NR</sub> @CsWO <sub>3</sub> ) 2.0%  | 4.96 ± 0.13  | -1.69 ± 0.04 | 3.81 ± 0.09  |

## References

- 1 N. R. Jana, L. Gearheart and C. J. Murphy, *J. Phys. Chem. B*, 2001, **105**, 4065-4067.
  - 2 C. Guo, S. Yin, M. Yan and T. Sato, *J. Mater. Chem.*, 2011, **21**, 5099-5105.
  - 3 <https://www.sigmaaldrich.com/TH/en/product/aldrich/520918>, (accessed July 2023).
  - 4 <https://www.sigmaaldrich.com/TH/en/product/aldrich/516988>, (accessed July 2023).
  - 5 <https://www.sigmaaldrich.com/TH/en/product/aldrich/241911>, (accessed July 2023).
  - 6 <https://www.sigmaaldrich.com/TH/en/product/aldrich/549541>, (accessed July 2023).
  - 7 [https://www.alibaba.com/product-detail/Manufacturers-Polyvinyl-Butyral-Pvb-Powder-Chemicals\\_1600332940238.html?s=p](https://www.alibaba.com/product-detail/Manufacturers-Polyvinyl-Butyral-Pvb-Powder-Chemicals_1600332940238.html?s=p), (accessed July 2023).
  - 8 S. Pizzanelli, C. Forte, S. Bronco, T. Guazzini, C. Serraglini and L. Calucci, *Coatings*, 2019, **9**, 247.
  - 9 <https://www.zauba.com/import-fumin+coating-hs-code.html>, (accessed July 2023).
-
